# Supplementary material for: Aberrant expression of CPSF1 promotes head and neck squamous cell carcinoma via regulating alternative splicing
Source: PubMed Central journal article supplement (PMC7241804; doi:10.1371/journal.pone.0233380), 2020-05-21
Supplement: pone.0233380.s020.pdf [file pone.0233380.s020.pdf]

| gene symbol    | Gene Name                                                                  | p value  |
|----------------|----------------------------------------------------------------------------|----------|
| PNISR          | PNN interacting serine and arginine rich protein                           | 0.000035 |
| SLC39A1        | solute carrier family 39 member 1                                          | 0.00041  |
| LAMC2          | laminin subunit gamma 2                                                    | 0.00061  |
| UBE2C          | ubiquitin conjugating enzyme E2 C                                          | 0.0037   |
| PUM2           | pumilio RNA binding family member 2                                        | 0.0057   |
| SLC5A6         | solute carrier family 5 member 6                                           | 0.0091   |
| HRAS           | HRas proto-oncogene, GTPase                                                | 0.01     |
| AKT2           | AKT serine/threonine kinase 2                                              | 0.011    |
| HDLBP          | high density lipoprotein binding protein                                   | 0.011    |
| TK1            | thymidine kinase 1                                                         | 0.011    |
| TXN2           | thioredoxin 2                                                              | 0.011    |
| MIR4435-1HG    | MIR4435-2 host gene                                                        | 0.013    |
| EIF4G1         | eukaryotic translation initiation factor 4 gamma 1                         | 0.015    |
| NIN            | ninein                                                                     | 0.015    |
| MICAL2         | microtubule associated monooxygenase, calponin and LIM domain containing 2 | 0.017    |
| PIGO           | phosphatidylinositol glycan anchor biosynthesis class O                    | 0.019    |
| PRMT5          | protein arginine methyltransferase 5                                       | 0.019    |
| ZNF618         | zinc finger protein 618                                                    | 0.024    |
| MIR205HG       | MIR205 host gene                                                           | 0.027    |
| UBR3           | ubiquitin protein ligase E3 component n-recognin 3                         | 0.028    |
| PSME4          | proteasome activator subunit 4                                             | 0.029    |
| SETX           | senataxin                                                                  | 0.029    |
| TGFBI          | transforming growth factor beta induced                                    | 0.03     |
| ZMYM2          | zinc finger MYM-type containing 2                                          | 0.033    |
| IFI16          | interferon gamma inducible protein 16                                      | 0.036    |
| SMEK2(PPP4R3B) | Protein Phosphatase 4 Regulatory Subunit 3B                                | 0.037    |
| ERO1L          | endoplasmic reticulum oxidoreductase 1 alpha                               | 0.038    |
| GPX1           | glutathione peroxidase 1                                                   | 0.038    |
| WNK1           | WNK lysine deficient protein kinase 1                                      | 0.038    |
| SZT2           | seizure threshold 2 homolog                                                | 0.04     |
| PRDX5          | peroxiredoxin 5                                                            | 0.042    |
| PHF15(JADE2)   | Jade Family PHD Finger 2(JADE2)                                            | 0.044    |
| SLC38A1        | solute carrier family 38 member 1                                          | 0.044    |
| RP11-104H15.10 |                                                                            | 0.047    |
| PTK7           | protein tyrosine kinase 7                                                  | 0.048    |
| TMEM147        | transmembrane protein 147                                                  | 0.048    |
| RPL17          | ribosomal protein L17                                                      | 0.049    |
| TAF10          | TATA-box binding protein associated factor 10                              | 0.049    |
| VMP1           | vacuole membrane protein 1                                                 | 0.049    |

## Supplementary Table 9

The list of significant genes after junction analysis of the knockdown dataset
