# Supplementary material for: Aberrant expression of CPSF1 promotes head and neck squamous cell carcinoma via regulating alternative splicing
Source: PubMed Central journal article supplement (PMC7241804; doi:10.1371/journal.pone.0233380), 2020-05-21
Supplement: pone.0233380.s021.pdf [file pone.0233380.s021.pdf]

| Gene symbol  | Gene name                                                   | p.value |
|--------------|-------------------------------------------------------------|---------|
| BOK          | BOK, BCL2 Family Apoptosis Regulator                        | 0.00065 |
| MAP4         | Microtubule Associated Protein 4                            | 0.00065 |
| ATG13        | Autophagy Related 13                                        | 0.0018  |
| FANCD2       | Fanconi anemia, complementation group D2                    | 0.0019  |
| AKNAD1       | AKNA Domain Containing 1                                    | 0.0023  |
| SZT2         | SZT2, KICSTOR Complex Subunit                               | 0.0035  |
| MB21D1       | Mab-21 Domain Containing 1                                  | 0.0046  |
| BPNT1        | 3'(2'), 5'-Bisphosphate Nucleotidase 1                      | 0.0059  |
| CTC-432M15.3 | ENSG00000273217 Gene                                        | 0.0061  |
| SLC25A19     | Solute Carrier Family 25 Member 19                          | 0.0065  |
| APIG1        | Adaptor Related Protein Complex 1 Gamma 1 Subunit           | 0.0068  |
| POLR3E       | RNA Polymerase III Subunit B                                | 0.009   |
| ZDHHC23      | Zinc Finger DHHC-Type Containing 23                         | 0.0093  |
| RUVBL1       | RuvB-like 1 (E. coli)                                       | 0.0094  |
| MTUS1        | Microtubule Associated Scaffold Protein 1                   | 0.01    |
| TRIB3        | Tribbles Pseudokinase 3                                     | 0.013   |
| ACSL5        | Acyl-CoA Synthetase Long-Chain Family Member 5              | 0.014   |
| PYGO2        | Pygopus Family PHD Finger 2                                 | 0.014   |
| ELAVL1       | ELAV Like RNA Binding Protein 1                             | 0.015   |
| NEK9         | NIMA (never in mitosis gene a)- related kinase 9            | 0.015   |
| RPS14        | Ribosomal Protein S14                                       | 0.015   |
| AC092755.4   | ENSG00000227161 Gene                                        | 0.016   |
| ADRM1        | Adhesion Regulating Molecule 1                              | 0.016   |
| HNRNPH1      | Heterogeneous Nuclear Ribonucleoprotein H1                  | 0.017   |
| PLAA         | Phospholipase A2 Activating Protein                         | 0.018   |
| ENTPD1-AS1   | ENTPD1 Antisense RNA 1                                      | 0.019   |
| CSPG4P12     | Chondroitin Sulfate Proteoglycan 4 Pseudogene 12            | 0.021   |
| ATPAF1       | ATP synthase mitochondrial F1 complex assembly factor 1     | 0.022   |
| EGLN1        | Egl-9 Family Hypoxia Inducible Factor 1                     | 0.022   |
| CTA-293F17.1 | Uncharacterized LOC101927811                                | 0.023   |
| HPS5         | Hermansky-Pudlak syndrome 5                                 | 0.024   |
| PSMD4        | Proteasome 26S Subunit, Non-ATPase 4                        | 0.025   |
| RAB31P       | RAB3A interacting protein (rabin3)                          | 0.025   |
| SLC25A12     | Solute Carrier Family 25 Member 12                          | 0.025   |
| PPP2R2D      | Protein Phosphatase 2 Regulatory Subunit Bdelta             | 0.026   |
| COX4I1       | Cytochrome C Oxidase Subunit 4I1                            | 0.027   |
| RPL12        | Ribosomal Protein L12                                       | 0.027   |
| MAPKAPK5     | Mitogen-Activated Protein Kinase-Activated Protein Kinase 5 | 0.028   |
| ENOSF1       | Enolase Superfamily Member 1                                | 0.029   |
| FAM111A      | Family With Sequence Similarity 111 Member A                | 0.031   |
| BRAT1        | BRCA1 Associated ATM Activator 1                            | 0.034   |
| EHF          | ETS Homologous Factor                                       | 0.034   |
| EIF6         | Eukaryotic Translation Initiation Factor 6                  | 0.035   |
| KRT8         | Keratin 8                                                   | 0.035   |
| VAPA         | VAMP Associated Protein A                                   | 0.037   |
| PARP6        | Poly(ADP-Ribose) Polymerase Family Member 6                 | 0.038   |
| NMRAL1       | NmrA Like Redox Sensor 1                                    | 0.039   |
| LIPH         | Lipase H                                                    | 0.04    |
| LSM12        | LSM12 homolog (S. cerevisiae)                               | 0.042   |
| UBE2C        | Ubiquitin Conjugating Enzyme E2 C                           | 0.043   |
| RDH11        | Retinol Dehydrogenase 11 (All-Trans/9-Cis/11-Cis)           | 0.044   |
| NFS1         | NFS1, Cysteine Desulfurase                                  | 0.045   |
| TNC          | Tenascin C                                                  | 0.047   |
| TMSB4X       | Thymosin Beta 4, X-Linked                                   | 0.049   |
| TPI1         | TPI1 pseudogene; triosephosphate isomerase 1                | 0.049   |
| ATP2C2       | ATPase, Ca <sup>++</sup> transporting, type 2C, member 2    | 0.05    |

## Supplementary Table 10

The list of significant genes after junction analysis of the overexpression dataset
