# Supplementary material for: Aberrant expression of CPSF1 promotes head and neck squamous cell carcinoma via regulating alternative splicing
Source: PubMed Central journal article supplement (PMC7241804; doi:10.1371/journal.pone.0233380), 2020-05-21
Supplement: pone.0233380.s022.pdf [file pone.0233380.s022.pdf]

| Gene symbol  | Junction                    | Presence of binding sites | Number of binding sites |
|--------------|-----------------------------|---------------------------|-------------------------|
| BOK          | chr2:242498408 – 242509540  | +                         | 9                       |
| MAP4         | chr3:47917175 – 47917251    | +                         | 1                       |
| ATG13        | chr11:46670733 – 46671808   | +                         | 6                       |
| FANCD2       | chr3:10116357 – 10122784    | +                         | 13                      |
| AKNAD1       | chr1:109484027 – 109486153  | +                         | 4                       |
| SZT2         | chr1:43916742 – 43917099    | -                         | 0                       |
| MB21D1       | chr6:74133546 – 74134580    | +                         | 4                       |
| BPNT1        | chr1:220247309 – 220263112  | +                         | 30                      |
| CTC-432M15.3 | chr5:131039842 – 131039926  | +                         | 3                       |
| SLC25A19     | chr17:73269074 – 73279674   | +                         | 27                      |
| AP1G1        | chr16:71798549 – 71803598   | +                         | 12                      |
| POLR3E       | chr16:22320831 – 22321172   | +                         | 1                       |
| ZDHHC23      | chr3:113667037 – 113667616  | +                         | 1                       |
| RUVBL1       | chr3:127783621 – 127801417  | +                         | 3                       |
| MTUS1        | chr8:17611366 – 17613362    | +                         | 2                       |
| TRIB3        | chr20:362035 – 368655       | +                         | 5                       |
| ACSL5        | chr10:114173065 – 114177604 | +                         | 7                       |
| PYGO2        | chr1:154935186 – 154936111  | +                         | 1                       |
| ELAVL1       | chr19:8023463 – 8038762     | +                         | 16                      |
| NEK9         | chr14:75572889 – 75573359   | +                         | 3                       |

Supplemental Table 11. Presence of the binding site of CPSF1 around ASE associated with CPSF1 overexpression
