# Supplementary material for: Aberrant expression of CPSF1 promotes head and neck squamous cell carcinoma via regulating alternative splicing
Source: PubMed Central journal article supplement (PMC7241804; doi:10.1371/journal.pone.0233380), 2020-05-21

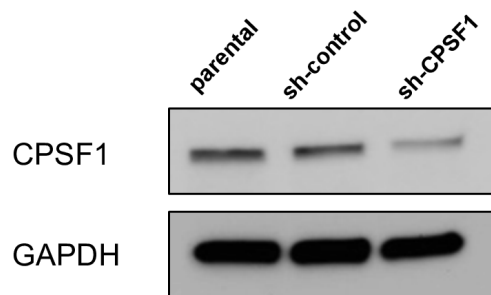

BICR22

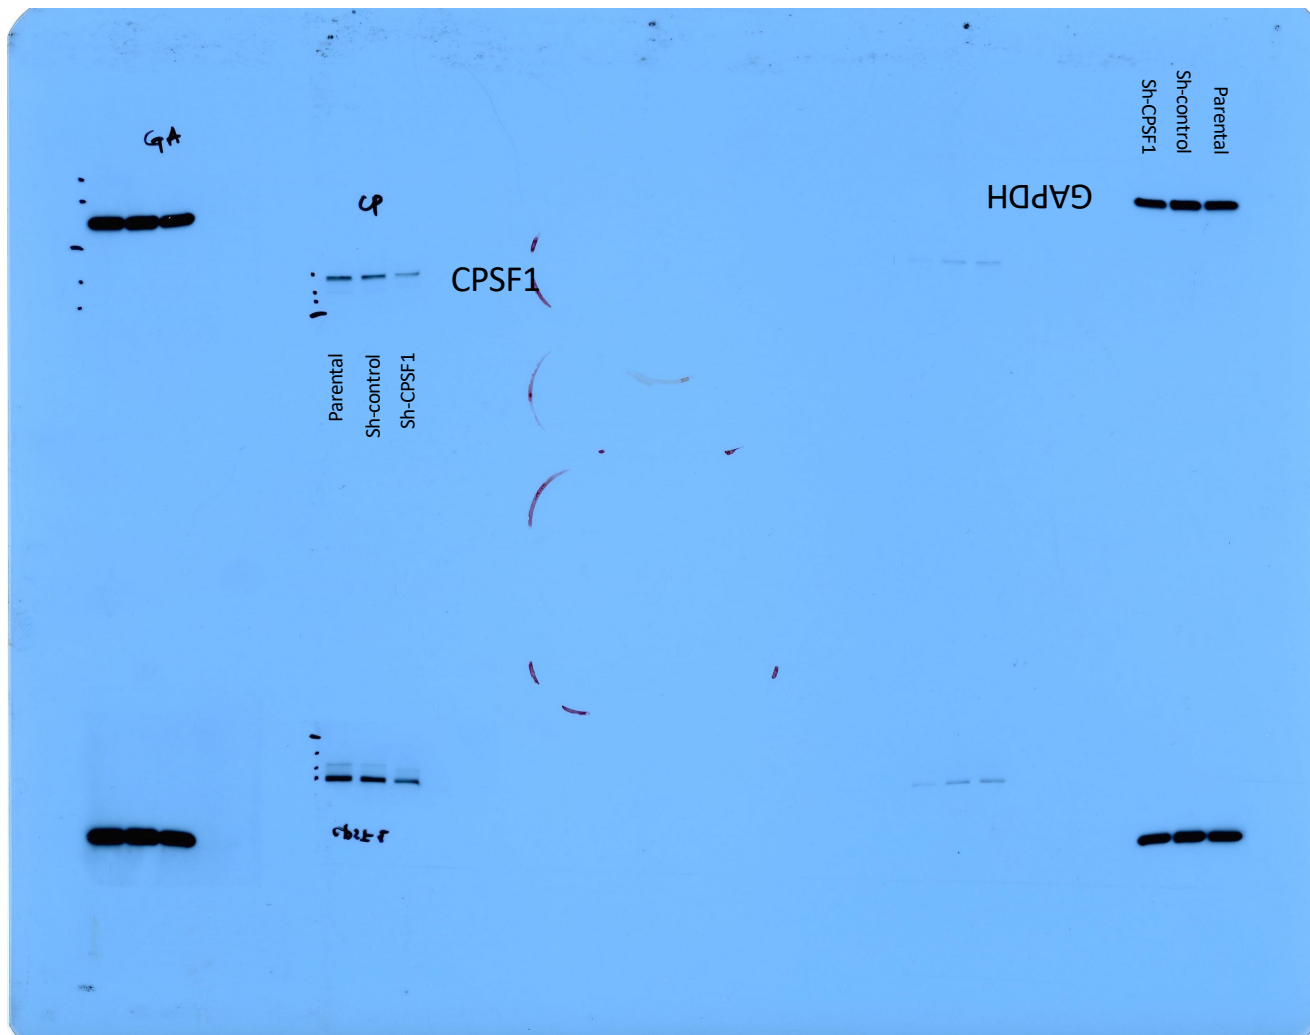

Supplement: pone.0233380.s023.pdf [file pone.0233380.s023.pdf]
